# Supplementary material
Source: MDPI journal article supplement (https://www.mdpi.com/2073-4395/10/9/1405)
Supplement: s1 [file s1]

# 1 The complete chloroplast genome sequence of the *Speiranthra gardenii*: Comparative 2 and adaptive evolutionary analysis

3 **Supplementary Table S4.** Comparison of site models, positive selective amino acid loci and estimation of parameters for five protein-coding genes in the Nolinoideae  
4 species.

| Protein-coding<br>gene | Model | np | Ln L      | Estimates of parameters       |                                    |              |         | Model<br>compared | LRT<br>P-value | Positive sites                                                                               |
|------------------------|-------|----|-----------|-------------------------------|------------------------------------|--------------|---------|-------------------|----------------|----------------------------------------------------------------------------------------------|
| ccsA                   | M3    | 37 | -1751.048 | p:                            | 0.14575                            | 0.82907      | 0.02518 | M0 vs. M3         | 0.000048685    | []                                                                                           |
|                        |       |    |           | $\omega$ :                    | 0.33548                            | 0.33548      | 12.4126 |                   |                |                                                                                              |
|                        | M0    | 33 | -1763.583 | $\omega_0$ :                  | 0.47116                            |              |         |                   |                | Not Allowed                                                                                  |
|                        | M2a   | 36 | -1751.048 | p:                            | 0.97482                            | 0            | 0.02518 | M1a vs. M2a       | 0.001278437    | []                                                                                           |
|                        |       |    |           | $\omega$ :                    | 0.33548                            | 1            | 12.4126 |                   |                |                                                                                              |
|                        | M1a   | 34 | -1757.710 | p:                            | 0.60093                            | 0.39907      |         |                   |                | Not Allowed                                                                                  |
|                        |       |    |           | $\omega$ :                    | 0                                  | 1            |         |                   |                |                                                                                              |
|                        | M8    | 36 | -1751.050 | p0 = 0.97486<br>(p1 = 0.0251) | p = 50.12233<br>$\omega$ = 12.4261 | q = 99.00000 |         | M7 vs. M8         | 0.001065942    | 170 D 0.989*, 175 R 0.969*, 178 F 0.764, 184 F 0.978*, 186 D 0.871, 206 R 0.868, 278 S 0.582 |
|                        | M7    | 34 | -1757.894 | p =                           | 0.04406                            | q =          | 0.05411 |                   |                | Not Allowed                                                                                  |
|                        | M8a   | 35 | -1757.710 | p0 = 0.60093<br>(p1 = 0.3991) | p = 0.00500<br>$\omega$ = 1.00000  | q = 1.51348  |         | M8a vs. M8        | 0.000262727    | Not Allowed                                                                                  |
|                        | M3    | 37 | -4432.200 | p:                            | 0.5974                             | 0.3673       | 0.0353  | M0 vs. M3         | 0              | []                                                                                           |

|             |     |    |            |                                |                                   |             |         |            |             |                                                                                                                                                                                                                                                                                                                                          |
|-------------|-----|----|------------|--------------------------------|-----------------------------------|-------------|---------|------------|-------------|------------------------------------------------------------------------------------------------------------------------------------------------------------------------------------------------------------------------------------------------------------------------------------------------------------------------------------------|
| <i>ndhF</i> |     |    | $\omega$ : | 0.02893                        | 0.58642                           | 5.89282     |         |            |             |                                                                                                                                                                                                                                                                                                                                          |
|             | M0  | 33 | -4469.495  | $\omega_0$ :                   | 0.33611                           |             |         |            |             | Not Allowed                                                                                                                                                                                                                                                                                                                              |
|             | M2a | 36 | -4432.209  | p:                             | 0.81224                           | 0.1557      | 0.03206 | M1a        | vs.         | 0.000135706 []                                                                                                                                                                                                                                                                                                                           |
|             |     |    |            | $\omega$ :                     | 0.11035                           | 1           | 6.11525 | M2a        |             |                                                                                                                                                                                                                                                                                                                                          |
|             | M1a | 34 | -4441.114  | p:                             | 0.68245                           | 0.31755     |         |            |             | Not Allowed                                                                                                                                                                                                                                                                                                                              |
|             |     |    |            | $\omega$ :                     | 0                                 | 1           |         |            |             |                                                                                                                                                                                                                                                                                                                                          |
|             | M8  | 36 | -4432.201  | p0 = 0.96496<br>(p1 = 0.03504) | p = 0.25532<br>$\omega$ = 5.91012 | q = 0.75505 |         | M7 vs. M8  | 0.000120891 | 77 V 0.814, 463 K<br>0.804, 486 A 0.610, 513<br>G 0.702, 514 R 0.638,<br>523 H 0.828, 531 T<br>0.942, 546 V 0.979*,<br>560 N 0.998**, 584 P<br>0.726, 586 F 0.947, 588<br>G 0.550, 590 P 0.961*,<br>596 L 0.698, 636 G<br>0.975*, 638 P 0.850,<br>675 L 0.637, 680 Q<br>0.871, 728 F 0.830, 729<br>F 0.720, 732 L 0.973*,<br>733 F 0.627 |
|             | M7  | 34 | -4441.221  | p =                            | 0.00582                           | q =         | 0.00731 |            |             | Not Allowed                                                                                                                                                                                                                                                                                                                              |
|             | M8a | 35 | -4441.114  | p0 = 0.68245<br>(p1 = 0.3176)  | p = 0.00500<br>$\omega$ = 1.00000 | q = 2.34031 |         | M8a vs. M8 | 0.000024187 | Not Allowed                                                                                                                                                                                                                                                                                                                              |

|              |     |    |            |                               |                                    |              |          |           |             |                                                         |
|--------------|-----|----|------------|-------------------------------|------------------------------------|--------------|----------|-----------|-------------|---------------------------------------------------------|
| <i>rpl20</i> | M3  | 37 | -563.9652  | p:                            | 0.34044                            | 0.15434      | 0.50522  | M0 vs. M3 | 0.98187355  | []                                                      |
|              |     |    |            | $\omega$ :                    | 0                                  | 0            | 1.1558   |           |             |                                                         |
|              | M0  | 33 | -564.1688  | $\omega$ 0:                   | 0.5857                             |              |          |           |             | Not Allowed                                             |
|              | M2a | 36 | -563.9653  | p:                            | 0.49477                            | 0            | 0.50523  | M1a vs.   | 0.991598492 | []                                                      |
|              |     |    |            | $\omega$ :                    | 0                                  | 1            | 1.15579  | M2a       |             |                                                         |
|              | M1a | 34 | -563.9737  | p:                            | 0.43612                            | 0.56388      |          |           |             | Not Allowed                                             |
|              |     |    |            | $\omega$ :                    | 0                                  | 1            |          |           |             |                                                         |
|              | M8  | 36 | -563.9652  | p0 = 0.49477<br>(p1 = 0.5052) | p = 0.00962<br>$\omega$ = 1.15579  | q = 2.26061  |          | M7 vs.M8  | 0.966701034 | 76 Y 0.698                                              |
|              | M7  | 34 | -563.9991  | p =                           | 0.0705                             | q =          | 0.06306  |           |             | Not Allowed                                             |
|              | M8a | 35 | -563.9739  | p0 = 0.43612<br>(p1 = 0.5639) | p = 0.00500<br>$\omega$ = 1.00000  | q = 1.27367  |          | M8a vs.M8 | 0.895206241 | Not Allowed                                             |
| <i>rps2</i>  | M3  | 37 | -1163.4474 | p:                            | 0.00884                            | 0.98693      | 0.00423  | M0 vs. M3 | 0           | []                                                      |
|              |     |    |            | $\omega$ :                    | 0.24037                            | 0.24038      | 240.8771 |           |             |                                                         |
|              | M0  | 33 | -1217.559  | $\omega$ 0:                   | 0.09996                            |              |          |           |             | Not Allowed                                             |
|              | M2a | 36 | -1163.446  | p:                            | 0.99577                            | 0            | 0.00423  | M1a vs.   | 0           | []                                                      |
|              |     |    |            | $\omega$ :                    | 0.24037                            | 1            | 240.876  | M2a       |             |                                                         |
|              | M1a | 34 | -1217.559  | p:                            | 0.99999                            | 0.00001      |          |           |             | Not Allowed                                             |
|              |     |    |            | $\omega$ :                    | 0.09995                            | 1            |          |           |             |                                                         |
|              | M8  | 36 | -1163.450  | p0 = 0.99577<br>(p1 = 0.0042) | p = 31.43766<br>$\omega$ = 241.456 | q = 99.00000 |          | M7 vs.M8  | 0           | 32 A 0.524, 131 N<br>0.504, 199 L 0.612,<br>237—1.000** |
|              | M7  | 34 | -1217.569  | p =                           | 11.12717                           | q =          | 99       |           |             | Not Allowed                                             |

|      |     |    |           |                                |                             |              |         |           |            |                        |
|------|-----|----|-----------|--------------------------------|-----------------------------|--------------|---------|-----------|------------|------------------------|
| rps3 | M8a | 35 | -1217.573 | p0 = 0.99999<br>(p1 = 0.00001) | p = 11.06100<br>ω = 1.00000 | q = 99.00000 |         | M8a vs.M8 | 0          | Not Allowed            |
|      | M3  | 37 | -1282.245 | p:                             | 0.48965                     | 0.00181      | 0.50854 | M0 vs. M3 | 0.70129752 | []                     |
|      |     |    |           | ω:                             | 0                           | 0.51113      | 0.51158 |           |            |                        |
|      | M0  | 33 | -1283.339 | ω0:                            | 0.25784                     |              |         |           |            | Not Allowed            |
|      | M2a | 36 | -1282.347 | p:                             | 0.85452                     | 0.05251      | 0.09297 | M1a vs. 1 |            | []                     |
|      |     |    |           | ω:                             | 0.14314                     | 1            | 1       | M2a       |            |                        |
|      | M1a | 34 | -1282.347 | p:                             | 0.85452                     | 0.14548      |         |           |            | Not Allowed            |
|      |     |    |           | ω:                             | 0.14315                     | 1            |         |           |            |                        |
|      | M8  | 36 | -1282.267 | p0 = 0.99999<br>(p1 = 0.00001) | p = 0.34957<br>ω = 1.00000  | q = 0.92823  |         | M7 vs.M8  | 0.999998   | 30 S 0.571, 86 E 0.568 |
|      | M7  | 34 | -1282.267 | p =                            | 0.34956                     | q =          | 0.92818 |           |            | Not Allowed            |
|      | M8a | 35 | -1282.278 | p0 = 0.99999<br>(p1 = 0.00001) | p = 0.41550<br>ω = 1.00000  | q = 1.15694  |         | M8a vs.M8 | 0.87226229 | Not Allowed            |

- 5
- Note:
- 6
- []—No data available
- 7
- np represents the degree of freedom
- 8
- Positively selected sites (\*  $p > 95\%$ ; \*\*  $p > 99\%$ )
