# Supplementary material
Source: MDPI journal article supplement (https://www.mdpi.com/2073-4395/10/9/1405)
Supplement: s1 [file s1]

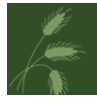

# 1 The complete chloroplast genome sequence of the *Speirantha gardenii*: Comparative 2 and adaptive evolutionary analysis

3 **Supplementary Table S1.** List of genes present in the cp genome of *Speirantha gardenii*.

| Category             | Group of genes               | Name of genes                    |                               |                               |                               |                               |
|----------------------|------------------------------|----------------------------------|-------------------------------|-------------------------------|-------------------------------|-------------------------------|
| RNA genes            | Ribosomal RNA genes          | <i>rrn4.5<sup>a</sup></i>        | <i>rrn5<sup>a</sup></i>       | <i>rrn16<sup>a</sup></i>      | <i>rrn23<sup>a</sup></i>      |                               |
|                      |                              | <i>trnA</i> -UGC <sup>a, b</sup> | <i>trnC</i> -GCA              | <i>trnD</i> -GUC              | <i>trnE</i> -UUC              | <i>trnF</i> -GAA              |
|                      |                              | <i>trnI</i> <sup>M</sup> -CAU    | <i>trnG</i> -GCC <sup>b</sup> | <i>trnG</i> -UCC              | <i>trnH</i> -GUG <sup>a</sup> | <i>trnI</i> -CAU <sup>a</sup> |
|                      |                              | <i>trnI</i> -GAU <sup>a, b</sup> | <i>trnK</i> -UUU              | <i>trnL</i> -CAA <sup>a</sup> | <i>trnL</i> -UAA <sup>b</sup> | <i>trnL</i> -UAG              |
|                      |                              | <i>trnM</i> -CAU                 | <i>trnN</i> -GUU <sup>a</sup> | <i>trnP</i> -UGG              | <i>trnQ</i> -UUG              | <i>trnR</i> -ACG <sup>a</sup> |
|                      |                              | <i>trnR</i> -UCU                 | <i>trnS</i> -GCU              | <i>trnS</i> -GGA              | <i>trnS</i> -UGA              | <i>trnT</i> -GGU              |
|                      | Transfer RNA genes           | <i>trnT</i> -UGU                 | <i>trnV</i> -GAC <sup>a</sup> | <i>trnV</i> -UAC <sup>b</sup> | <i>trnW</i> -CCA              | <i>trnY</i> -GUA              |
|                      | Subunits of photosystem I    | <i>psaA</i>                      | <i>psaB</i>                   | <i>psaC</i>                   | <i>psaI</i>                   | <i>psaJ</i>                   |
|                      |                              | <i>ycf3<sup>c</sup></i>          | <i>ycf4</i>                   |                               |                               |                               |
|                      |                              | <i>psbA</i>                      | <i>psbB</i>                   | <i>psbC</i>                   | <i>psbD</i>                   | <i>psbE</i>                   |
| Photosynthetic genes | Subunits of photosystem II   | <i>psbF</i>                      | <i>psbH</i>                   | <i>psbI</i>                   | <i>psbJ</i>                   | <i>psbK</i>                   |
|                      |                              | <i>psbL</i>                      | <i>psbM</i>                   | <i>psbN</i>                   | <i>psbT</i>                   | <i>psbZ</i>                   |
|                      | Subunits of cytochrome       | <i>petA</i>                      | <i>petB<sup>b</sup></i>       | <i>petD<sup>b</sup></i>       | <i>petG</i>                   | <i>petL</i>                   |
|                      |                              | <i>petN</i>                      |                               |                               |                               |                               |
|                      | Subunits of ATP synthase     | <i>atpA</i>                      | <i>atpB</i>                   | <i>atpE</i>                   | <i>atpF<sup>b</sup></i>       | <i>atpH</i>                   |
|                      |                              | <i>atpI</i>                      |                               |                               |                               |                               |
|                      | The large subunit of Rubisco | <i>rbcL</i>                      |                               |                               |                               |                               |
|                      |                              |                                  |                               |                               |                               |                               |
|                      |                              |                                  |                               |                               |                               |                               |
|                      |                              |                                  |                               |                               |                               |                               |

|                                             |                                       |                             |                                 |                           |                          |                           |
|---------------------------------------------|---------------------------------------|-----------------------------|---------------------------------|---------------------------|--------------------------|---------------------------|
| Transcription and translation-related genes | Subunits of NADH dehydrogenase        | <i>ndhA</i> <sup>b</sup>    | <i>ndhB</i> <sup>a, b</sup>     | <i>ndhC</i>               | <i>ndhD</i>              | <i>ndhE</i>               |
|                                             |                                       | <i>ndhF</i>                 | <i>ndhG</i>                     | <i>ndhH</i>               | <i>ndhI</i>              | <i>ndhJ</i>               |
|                                             |                                       | <i>ndhK</i>                 |                                 |                           |                          |                           |
|                                             | ATP-dependent protease subunit P      | <i>clpP</i> <sup>c</sup>    |                                 |                           |                          |                           |
|                                             | Chloroplast envelope membrane protein | <i>cemA</i>                 |                                 |                           |                          |                           |
|                                             | Small subunit of the ribosome         | <i>rps2</i>                 | <i>rps3</i>                     | <i>rps4</i>               | <i>rps7</i> <sup>a</sup> | <i>rps8</i>               |
|                                             |                                       | <i>rps11</i>                | <i>rps12</i> <sup>a, c, d</sup> | <i>rps14</i>              | <i>rps15</i>             | <i>rps16</i> <sup>e</sup> |
|                                             |                                       | <i>rps18</i>                | <i>rps19</i> <sup>a</sup>       |                           |                          |                           |
|                                             | Large subunit of ribosome             | <i>rpl2</i> <sup>a</sup>    | <i>rpl14</i>                    | <i>rpl16</i> <sup>b</sup> | <i>rpl20</i>             | <i>rpl22</i>              |
|                                             |                                       | <i>rpl23</i>                | <i>rpl32</i>                    | <i>rpl33</i>              | <i>rpl36</i>             |                           |
|                                             | DNA-dependent RNA polymerase          | <i>rpoA</i>                 | <i>rpoB</i>                     | <i>rpoC1</i> <sup>b</sup> | <i>rpoC2</i>             |                           |
|                                             | Translational initiation factor       | <i>infA</i>                 |                                 |                           |                          |                           |
|                                             | Maturase                              | <i>matK</i>                 |                                 |                           |                          |                           |
| Other genes                                 | Subunit of acetyl-CoA                 | <i>accD</i>                 |                                 |                           |                          |                           |
|                                             | C-type cytochrome synthesis gene      | <i>ccsA</i>                 |                                 |                           |                          |                           |
| Genes of unknown function                   | Component of TIC complex              | <i>ycf1</i> <sup>a, e</sup> |                                 |                           |                          |                           |
|                                             | Hypothetical proteins                 | <i>ycf2</i> <sup>a</sup> ,  |                                 |                           |                          |                           |
|                                             |                                       | <i>ycf15</i> <sup>a</sup> , |                                 |                           |                          |                           |
|                                             |                                       | <i>ycf68</i> <sup>a</sup>   |                                 |                           |                          |                           |

<sup>a</sup> –Two gene copies in IRs; <sup>b</sup>—Gene containing a single intron; <sup>c</sup> - Gene containing two introns; <sup>d</sup>—Gene divided into two independent transcription units; <sup>e</sup> –Two copies—One intact gene and another is a pseudogene.
