# Supplementary material
Source: MDPI journal article supplement (https://www.mdpi.com/2073-4395/10/9/1405)
Supplement: s1 [file s1]

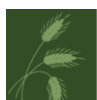

# The complete chloroplast genome sequence of the *Speirantha gardenii*: Comparative and adaptive evolutionary analysis

Supplementary Table S5. List of chloroplast genomes used for phylogenetic analysis.

| Sl. No. | Species Name                         | Sub-Family Name | GenBank Accession number |
|---------|--------------------------------------|-----------------|--------------------------|
| 1.      | <i>Polygonatum cyrtoneura</i>        | Nolinoideae     | NC_028429                |
| 2.      | <i>Polygonatum humile</i>            | Nolinoideae     | MN218691                 |
| 3.      | <i>Polygonatum stenophyllum</i>      | Nolinoideae     | NC_035995                |
| 4.      | <i>Heteropolygonatum pendulum</i>    | Nolinoideae     | MH891736                 |
| 5.      | <i>Heteropolygonatum altelobatum</i> | Nolinoideae     | MH891734                 |
| 6.      | <i>Disporopsis jinfushanensis</i>    | Nolinoideae     | MH891733                 |
| 7.      | <i>Maianthemum dilatatum</i>         | Nolinoideae     | NC_039133                |
| 8.      | <i>Maianthemum bicolor</i>           | Nolinoideae     | NC_035970                |
| 9.      | <i>Dracaena cochinchinensis</i>      | Nolinoideae     | NC_039943                |
| 10.     | <i>Dracaena cambodiana</i>           | Nolinoideae     | NC_039776                |
| 11.     | <i>Nolina atopocarpa</i>             | Nolinoideae     | NC_032708                |
| 12.     | <i>Rohdea chinensis</i>              | Nolinoideae     | MH356725                 |
| 13.     | <i>Reineckea carnea</i>              | Nolinoideae     | MK801116                 |
| 14.     | <i>Speirantha gardenii</i>           | Nolinoideae     | In this study            |
| 15.     | <i>Convallaria keiskei</i>           | Nolinoideae     | NC_042228                |
| 16.     | <i>Liriope spicata</i>               | Nolinoideae     | NC_042227                |
| 17.     | <i>Liriope muscari</i>               | Nolinoideae     | NC_045384                |
| 18.     | <i>Asparagus schoberioides</i>       | Asparagoideae   | NC_035969                |
| 19.     | <i>Asparagus officinalis</i>         | Asparagoideae   | NC_034777                |
