# Supplementary material
Source: MDPI journal article supplement (https://www.mdpi.com/2073-4395/10/9/1405)
Supplement: s1 [file s1]

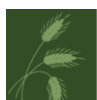

# The complete chloroplast genome sequence of the *Speirantha gardenii*: Comparative and adaptive evolutionary analysis

Supplementary Table S2. Comparison of general features of Nolinoideae chloroplast genomes.

| Genome features                   | <i>Speirantha gardenii</i> | <i>Reineckea carnea</i> | <i>Rohdea chinensis</i> | <i>Convallaria keiskei</i> |
|-----------------------------------|----------------------------|-------------------------|-------------------------|----------------------------|
| Total length (bp)                 | 156,869                    | 157,059                 | 158,795                 | 162,109                    |
| LSC length (bp)                   | 85,368                     | 85,474                  | 86,525                  | 85,344                     |
| SSC length (bp)                   | 18,627                     | 18,535                  | 21,363                  | 18,487                     |
| IR length (bp)                    | 26,437                     | 26,525                  | 25,340                  | 29,139                     |
| GC content (%)                    | 37.6                       | 37.6                    | 37.2                    | 37.9                       |
| Total genes                       | 136                        | 136                     | 136                     | 136                        |
| Genes duplicated in the IR region | 21                         | 21                      | 21                      | 21                         |
| Protein-coding genes              | 81                         | 81                      | 81                      | 81                         |
| tRNA genes                        | 30                         | 30                      | 30                      | 30                         |
| rRNA genes                        | 4                          | 4                       | 4                       | 4                          |
