# Supplementary material
Source: MDPI journal article supplement (https://www.mdpi.com/2073-4395/10/9/1405)
Supplement: s1 [file s1]

# 1 The complete chloroplast genome sequence of the *Speirantha gardenii*: Comparative 2 and adaptive evolutionary analysis

3 **Supplementary Table S3.** Comparison of site models, positive selective amino acid loci and estimation of parameters for seven protein-coding genes in the four  
4 Nolinoideae species.

| Protein-coding gene | Model | np          | Ln L        | Estimates of parameters |             |             |            | Model compared | LRT P-value                                                    | Positive sites |
|---------------------|-------|-------------|-------------|-------------------------|-------------|-------------|------------|----------------|----------------------------------------------------------------|----------------|
| ccsA                | M3    | 11          | -1303.21110 | p:                      | 0.14148     | 0.12974     | 0.72878    | M0 vs. M3      | 1                                                              | []             |
|                     | M0    | 7           | -1303.21110 | ω:                      | 0.96703     | 0.96721     | 0.96727    |                |                                                                |                |
|                     | M2a   | 10          | -1303.21110 | ω0:                     |             | 0.96722     |            | M1a vs. M2a    | 1                                                              | Not Allowed    |
|                     | M1a   | 8           | -1303.21110 | p:                      | 0.99996     | 0           | 0.00004    |                |                                                                |                |
|                     |       |             |             | ω:                      | 0.96718     | 1           | 1          |                |                                                                |                |
|                     |       |             |             | p:                      | 0.99999     | 0.00001     |            |                |                                                                |                |
|                     | M8    | 10          | -1303.21110 | ω:                      | 0.96724     | 1           |            |                |                                                                |                |
|                     |       |             |             | p0 =                    | p =         | q =         |            |                |                                                                |                |
|                     |       |             |             | 0.00138                 | 0.00500     | 1.13616     | M7 vs. M8  | 0.999999       | 81 N 0.642, 125 S 0.642, 223 S 0.642, 280 S 0.642, 292 I 0.636 |                |
|                     | (p1 = | ω =         |             |                         |             |             |            |                |                                                                |                |
| M7                  | 8     | -1303.21110 | 0.99862)    | 1.00000                 |             |             |            |                |                                                                |                |
| M8a                 | 9     | -1303.21110 | p =         | 2.39956                 | q =         | 0.005       | M8a vs. M8 | 0.968859739    | Not Allowed                                                    |                |
|                     |       |             | p0 =        | p =                     | q = 3.33654 |             |            |                |                                                                |                |
|                     |       |             | 0.99999     | 99.00000                |             |             |            |                |                                                                |                |
| infA                | M3    | 11          | -288.84309  | (p1 =                   |             | ω = 1.00000 |            | M0 vs. M3      | 0.003233836                                                    | []             |
|                     |       |             |             | 0.00001)                |             |             |            |                |                                                                |                |
|                     |       |             |             | p:                      | 0.88396     | 0           | 0.11604    |                |                                                                |                |
|                     | M0    | 7           | -296.76578  | ω:                      | 0           | 15.06211    | 30.29156   | M1a vs. M2a    | 0.003430367                                                    | Not Allowed    |
|                     | ω0:   |             | 0.83559     |                         |             |             |            |                |                                                                |                |
|                     | M2a   | 10          | -288.84309  | p:                      | 0.88396     | 0           | 0.11604    |                |                                                                | []             |
|                     | ω:    | 0           | 1           | 30.29110                |             |             |            |                |                                                                |                |
|                     | M1a   | 8           | -294.51818  | p:                      | 0.65850     | 0.34150     |            |                |                                                                | Not Allowed    |

|             |     |    |             | $\omega$ :                   | 0                                 | 1                                  |             |  |             |                                                                                                                                                                                                   |
|-------------|-----|----|-------------|------------------------------|-----------------------------------|------------------------------------|-------------|--|-------------|---------------------------------------------------------------------------------------------------------------------------------------------------------------------------------------------------|
|             |     |    |             | p0 =                         | p =                               | q =                                |             |  |             |                                                                                                                                                                                                   |
| <i>ndhF</i> | M8  | 10 | -28884309   | 0.88396<br>(p1 =<br>0.11604) | 0.00500<br>$\omega$ =<br>30.29109 | 1.59251                            | M7 vs. M8   |  | 0.003426291 | 32 L 0.759, 56 I 0.881, 57 G 0.966*, 58 M 0.965*, 59 Q 0.737, 60 L 0.961*                                                                                                                         |
|             | M7  | 8  | -294.51937  | p =                          | 0.005                             | q = 0.01537                        |             |  |             | Not Allowed                                                                                                                                                                                       |
|             | M8a | 9  | -294.51817  | p0 =<br>(p1 =<br>0.34150)    | p =<br>0.00500                    | q = 99.00000<br>$\omega$ = 1.00000 | M8a vs. M8  |  | 0.000754412 | Not Allowed                                                                                                                                                                                       |
|             | M3  | 11 | -3025.7942  | p:                           | 0                                 | 0.98854                            |             |  |             | []                                                                                                                                                                                                |
|             | M0  | 7  | -3032.0121  | $\omega$ :                   | 0                                 | 0.30817                            | M0 vs. M3   |  | 0.014387898 | Not Allowed                                                                                                                                                                                       |
|             | M2a | 10 | -3025.7942  | p:                           | 0.98854                           | 0                                  |             |  |             | []                                                                                                                                                                                                |
|             | M1a | 8  | -3030.6801  | $\omega$ :                   | 0.30816                           | 1                                  | M1a vs. M2a |  | 0.007552603 | Not Allowed                                                                                                                                                                                       |
|             | M8  | 10 | -3026.4151  | p:                           | 0.65639                           | 0.34361                            |             |  |             | Not Allowed                                                                                                                                                                                       |
|             | M7  | 8  | -3030.6829  | $\omega$ :                   | 0                                 | 1                                  |             |  |             | 67 F 0.543, 281 F 0.568, 472 Y 0.581, 486 E 0.606, 505 N 0.571, 560 H 0.583, 574 L 0.617, 596 L 0.665, 614 S 0.616, 636 G 0.632, 675 L 0.580, 680 Q 0.628, 728 F 0.568, 732 L 0.963*, 734 F 0.931 |
|             | M8a | 9  | -3030.6801  | p0 =<br>(p1 =<br>0.34361)    | p =<br>0.00500                    | q =<br>2.09219                     | M7 vs. M8   |  | 0.014012143 | Not Allowed                                                                                                                                                                                       |
| <i>ndhF</i> | M7  | 8  | -3030.6829  | p =                          | 0.005                             | q = 0.01744                        |             |  |             | Not Allowed                                                                                                                                                                                       |
|             | M8a | 9  | -3030.6801  | p0 =<br>(p1 =<br>0.34361)    | p =<br>0.00500                    | q = 1.89788<br>$\omega$ = 1.00000  | M8a vs. M8  |  | 0.003493481 | Not Allowed                                                                                                                                                                                       |
|             | M3  | 11 | -495.138791 | p:                           | 0.12046                           | 0.62514                            |             |  |             | []                                                                                                                                                                                                |
|             | M0  | 7  | -495.13879  | $\omega$ :                   | 0.89278                           | 0.89279                            | M0 vs. M3   |  | 1           | Not Allowed                                                                                                                                                                                       |
| <i>ndhF</i> | M2a | 10 | -495.13879  | $\omega$ 0:                  |                                   | 0.89279                            |             |  |             | Not Allowed                                                                                                                                                                                       |
|             | M2a | 10 | -495.13879  | p:                           | 1                                 | 0                                  | M1a vs.     |  | 1           | []                                                                                                                                                                                                |

|       |     |    |            |          |          |              |           |             |             |                                                                             |    |
|-------|-----|----|------------|----------|----------|--------------|-----------|-------------|-------------|-----------------------------------------------------------------------------|----|
| rpl20 |     |    |            | ω:       | 0.89279  | 1            | 1         | M2a         |             |                                                                             |    |
|       | M1a | 8  | -495.13879 | p:       | 0.99999  | 0.00001      |           |             |             | Not Allowed                                                                 |    |
|       |     |    |            | ω:       | 0.89279  | 1            |           |             |             |                                                                             |    |
|       |     |    |            | p0 =     | p =      | q =          |           |             |             |                                                                             |    |
|       | M8  | 10 | -495.13884 | 0.99999  | 99.00000 | 11.93645     |           |             |             | 43 L 0.620, 80 R 0.612, 116 M 0.612, 117 K 0.603                            |    |
|       |     |    |            | (p1 =    | ω =      |              |           | M7 vs. M8   | 0.999935002 |                                                                             |    |
|       |     |    |            | 0.00001) | 1.00000  |              |           |             |             |                                                                             |    |
|       | M7  | 8  | -495.13891 | p =      | 99       | q =          | 13.3645   |             |             | Not Allowed                                                                 |    |
|       |     |    |            | p0 =     | p =      | q = 99.00000 |           |             |             |                                                                             |    |
|       |     |    |            | 0.65850  | 0.00500  |              |           |             |             |                                                                             |    |
|       | M8a | 9  | -495.13886 | (p1 =    |          |              |           | M8a vs. M8  | 0.994953769 | Not Allowed                                                                 |    |
|       |     |    |            | 0.34150) |          | ω = 1.00000  |           |             |             |                                                                             |    |
| rps2  | M3  | 11 | -990.78293 | p:       | 0        | 0.99482      | 0.00518   |             |             |                                                                             | [] |
|       |     |    |            | ω:       | 0        | 1.06492      | 999       | M0 vs. M3   | 0.000077368 |                                                                             |    |
|       | M0  | 7  | -1002.8175 | ω0:      |          | 0.37668      |           |             |             | Not Allowed                                                                 |    |
|       | M2a | 10 | -990.78579 | p:       | 0.99466  | 0.00016      | 0.00518   |             |             |                                                                             | [] |
|       |     |    |            | ω:       | 1        | 1            | 999       | M1a vs. M2a |             |                                                                             |    |
|       |     |    |            | p:       | 0.56757  | 0.43243      |           |             |             |                                                                             |    |
|       | M1a | 8  | -1002.6533 | ω:       | 0        | 1            |           |             |             | Not Allowed                                                                 |    |
|       |     |    |            | p0 =     | p =      | q =          |           |             |             |                                                                             |    |
|       |     |    |            | 0.95550  | 0.00500  | 1.88691      |           |             |             |                                                                             |    |
|       | M8  | 10 | -995.79569 | (p1 =    | ω =      |              |           | M7 vs. M8   | 0.000472057 | 48 T 0.838, 59 D 0.839, 91 A 0.838, 160 E 0.840, 199 L 0.850, 237 - 0.998** |    |
|       |     |    |            | 0.04450) | 92.60324 |              |           |             |             |                                                                             |    |
|       | M7  | 8  | -1003.4541 | p =      | 7.72098  | q =          | 0.005     |             |             | Not Allowed                                                                 |    |
|       |     |    |            | p0 =     | p =      | q = 99.00000 |           |             |             |                                                                             |    |
|       |     |    |            | 0.56756  | 0.00500  |              |           |             |             |                                                                             |    |
|       | M8a | 9  | -1002.6533 | (p1 =    |          |              |           | M8a vs. M8  | 0.000212716 | Not Allowed                                                                 |    |
|       |     |    |            | 0.43244) |          | ω = 1.00000  |           |             |             |                                                                             |    |
|       | M3  | 11 | -939.86114 | p:       | 0.00001  | 0.98991      | 0.01008   |             |             |                                                                             | [] |
|       |     |    | ω:         | 0        | 0.35239  | 149.119      | M0 vs. M3 | 0.001534958 |             |                                                                             |    |
|       | M0  | 7  | -948.61840 | ω0:      |          | 0.21127      |           |             |             | Not Allowed                                                                 |    |

|             |     |    |            |             |            |                    |           |             |             |                                                                                                                                                                                                                                                                                                                                                                                                                                                   |
|-------------|-----|----|------------|-------------|------------|--------------------|-----------|-------------|-------------|---------------------------------------------------------------------------------------------------------------------------------------------------------------------------------------------------------------------------------------------------------------------------------------------------------------------------------------------------------------------------------------------------------------------------------------------------|
| <i>rps3</i> | M2a | 10 | -940.66971 | p:          | 0          | 0.99056            | 0.00944   | M1a vs. M2a | 0.00180759  | Not Allowed                                                                                                                                                                                                                                                                                                                                                                                                                                       |
|             |     |    |            | $\omega$ :  | 0          | 1                  | 326.72277 |             |             |                                                                                                                                                                                                                                                                                                                                                                                                                                                   |
|             | M1a | 8  | -946.98547 | p:          | 0.82242    | 0.17758            |           |             |             |                                                                                                                                                                                                                                                                                                                                                                                                                                                   |
|             |     |    |            | $\omega$ :  | 0          | 1                  |           |             |             |                                                                                                                                                                                                                                                                                                                                                                                                                                                   |
|             |     |    |            | p0 =        | p =        | q =                |           |             |             |                                                                                                                                                                                                                                                                                                                                                                                                                                                   |
|             | M8  | 10 | -940.23250 | 0.96563     | 0.00500    | 1.89390            |           | M7 vs. M8   | 0.00067768  | 28 N 0.937, 30 S 0.599, 68 Q 0.584, 105 F 0.608, 106 H 0.580, 221 - 0.988*                                                                                                                                                                                                                                                                                                                                                                        |
|             |     |    |            | (p1 =       | $\omega$ = |                    |           |             |             |                                                                                                                                                                                                                                                                                                                                                                                                                                                   |
|             |     |    |            | 0.03437)    | 40.73123   |                    |           |             |             |                                                                                                                                                                                                                                                                                                                                                                                                                                                   |
|             | M7  | 8  | -947.52934 | p =         | 0.02784    | q =                | 0.1226    |             |             |                                                                                                                                                                                                                                                                                                                                                                                                                                                   |
|             |     |    |            | p0 =        | p =        | q = 1.93256        |           |             |             |                                                                                                                                                                                                                                                                                                                                                                                                                                                   |
| <i>ycf1</i> | M8a | 9  | -946.98547 | 0.82242     | 0.00500    |                    |           | M8a vs. M8  | 0.00023781  | Not Allowed                                                                                                                                                                                                                                                                                                                                                                                                                                       |
|             |     |    |            | (p1 =       |            | $\omega$ = 1.00000 |           |             |             |                                                                                                                                                                                                                                                                                                                                                                                                                                                   |
|             |     |    |            | 0.17758)    |            |                    |           |             |             |                                                                                                                                                                                                                                                                                                                                                                                                                                                   |
|             | M3  | 11 | -7470.8571 | p:          | 0.82732    | 0.16988            | 0.00279   | M0 vs. M3   | 0.000030431 | Not Allowed                                                                                                                                                                                                                                                                                                                                                                                                                                       |
|             |     |    |            | $\omega$ :  | 0          | 4.94302            | 56.67984  |             |             |                                                                                                                                                                                                                                                                                                                                                                                                                                                   |
|             | M0  | 7  | -7483.8992 | $\omega$ 0: |            | 0.88698            |           |             |             |                                                                                                                                                                                                                                                                                                                                                                                                                                                   |
|             |     |    |            | p:          | 0.98071    | 0.00001            | 0.01929   | M1a vs. M2a | 0.000050003 | Not Allowed                                                                                                                                                                                                                                                                                                                                                                                                                                       |
|             | M2a | 10 | -7470.9807 | $\omega$ :  | 0.5459     | 1                  | 23.679    |             |             |                                                                                                                                                                                                                                                                                                                                                                                                                                                   |
|             |     |    |            | p:          | 0.45168    | 0.54832            |           |             |             |                                                                                                                                                                                                                                                                                                                                                                                                                                                   |
|             | M1a | 8  | -7480.8841 | $\omega$ :  | 0          | 1                  |           |             |             |                                                                                                                                                                                                                                                                                                                                                                                                                                                   |
| <i>ycf1</i> |     |    |            | p0 =        | p =        | q =                |           |             |             |                                                                                                                                                                                                                                                                                                                                                                                                                                                   |
|             |     |    |            | 0.87705     | 0.00500    | 2.13196            |           |             |             |                                                                                                                                                                                                                                                                                                                                                                                                                                                   |
|             |     |    |            |             |            |                    |           |             |             |                                                                                                                                                                                                                                                                                                                                                                                                                                                   |
|             |     |    |            |             |            |                    |           |             |             |                                                                                                                                                                                                                                                                                                                                                                                                                                                   |
|             |     |    |            |             |            |                    |           |             |             |                                                                                                                                                                                                                                                                                                                                                                                                                                                   |
|             |     |    |            |             |            |                    |           |             |             |                                                                                                                                                                                                                                                                                                                                                                                                                                                   |
|             |     |    |            |             |            |                    |           |             |             |                                                                                                                                                                                                                                                                                                                                                                                                                                                   |
|             |     |    |            |             |            |                    |           |             |             |                                                                                                                                                                                                                                                                                                                                                                                                                                                   |
|             |     |    |            |             |            |                    |           |             |             |                                                                                                                                                                                                                                                                                                                                                                                                                                                   |
|             |     |    |            |             |            |                    |           |             |             |                                                                                                                                                                                                                                                                                                                                                                                                                                                   |
|             | M8  | 10 | -7471.6201 | (p1 =       | $\omega$ = |                    |           | M7 vs. M8   | 0.000066777 | 267 Y 0.939, 271 Y 0.517, 290 D 0.520, 296 Y 0.995**, 407 L 0.523, 438 R 0.536, 447 S 0.503, 491 T 0.545, 507 Q 0.503, 558 K 0.920, 601 I 0.539, 804 L 0.523, 864 I 0.503, 921 F 0.535, 953 R 0.936, 1068 S 0.558, 1082 Q 0.927, 1096 S 0.516, 1108 R 0.935, 1162 R 0.510, 1255 L 0.559, 1340 L 0.926, 1370 Q 0.524, 1373 Q 0.503, 1375 F 0.515, 1484 Q 0.509, 1499 I 0.523, 1526 F 0.541, 1543 L 0.505, 1639 Q 0.530, 1671 H 0.925, 1672 F 0.515 |
|             |     |    |            | 0.12295)    | 7.84238    |                    |           |             |             |                                                                                                                                                                                                                                                                                                                                                                                                                                                   |

|     |   |            |                           |                |                    |         |               |             |             |
|-----|---|------------|---------------------------|----------------|--------------------|---------|---------------|-------------|-------------|
| M7  | 8 | -7481.2343 | p =                       | 0.02352        | q =                | 0.00875 |               |             | Not Allowed |
| M8a | 9 | -7480.8841 | p0 =<br>(p1 =<br>0.54832) | p =<br>0.00500 | q = 1.60872        |         | M8a vs.<br>M8 | 0.000016742 | Not Allowed |
|     |   |            |                           |                | $\omega = 1.00000$ |         |               |             |             |

- 5
- Note:
- 6
- [ ]—No data available
- 7
- np represents the degree of freedom
- 8
- Positively selected sites (\*  $p > 95\%$ ; \*\*  $p > 99\%$ )
